# Supplementary material
Source: Elsevier journal article supplement (https://www.sciencedirect.com/science/article/pii/S1870345317301793)
Supplement: mmc1 [file mmc1.docx]

**Apéndice 1. Metodología para la búsqueda de literatura y de programas de formación de recursos humanos.**

1. Búsqueda de publicaciones

Se llevaron a cabo búsquedas sistemáticas utilizando las plataformas SIS indicadas a continuación para publicaciones en español y en inglés.

| Español | Inglés |
| --- | --- |
| Academic Search Complete  CLASE  Environment Complete  Fuente Académica  InfoTrac Informe!  InfoTrac Informe!  JSTOR Journals  MEDLINE  Narcis  Networked Digital Library of Theses & Dissertations  OAIster  PERIODICA  Publisher Provided Full Text Searching File  RePEc  Scopus  TESIUNAM  Web Citation Index (ISI) |  |

Las búsquedas abarcaron conjuntos de palabras relacionadas o sinónimos de acuerdo a los grupos que se muestran en la tabla a continuación. Para su representación gráfica estos grupos se redujeron fusionando algunos de ellos.

| Español | Inglés |
| --- | --- |
| Servicios ambientales o Servicios ecosistémicos | Services Environment* ecosistem* natural* climate* |
| Socioecosistema o Socioecológico o Social Ambiental | Vulnerability Environment* ecosistem* natural* climate* |
| Vulnerabilidad Ambient* ecosistema* natural* clima* volcán, metereológico hidrometereológico Socio* México | Adaptation Environment* ecosistem* natural* climate* |
| Adaptación Ambient* ecosistema* natural* clima* volcán, metereológico hidrometereológico Socio* México | | Risk Environment* ecosistem* natural* climate* |  | | --- | --- | |
| Riesgos Ambient* ecosistema* natural* clima* volcán, metereológico hidrometereológico Socio* México | Disaster Environment* ecosistem* natural* climate* |
| Desastre Ambient* ecosistema* natural* clima* volcán, metereológico hidrometereológico Socio* México | floods Environment* ecosistem* natural* climate* |
| Inundaciones Ambient* ecosistema* natural* clima* volcán, metereológico hidrometereológico Socio* México | floods Environment* ecosistem* natural* climate* |
| Peligro Ambient* ecosistema* natural* clima* volcán, metereológico hidrometereológico Socio* México | danger* Environment* ecosistem* natural* climate* |
| Resistencia Ambient* ecosistema* natural* clima* volcán, metereológico hidrometereológico Socio* México | resistance Environment* ecosistem* natural* climate* |
| Resiliencia Ambient* ecosistema* natural* clima* volcán, metereológico hidrometereológico Socio* México | resilien* Environment* ecosistem* natural* climate* |
| Adapt* Ambient* ecosistema* natural* clima* volcán, metereológico hidrometereológico Socio* México | adapta* Environment* ecosistem* natural* climate* |
| Servicios ambientales o Servicios ecosistémicos | Sustainability Environment* ecosistem* natural* climate* |
