# Supplementary material
Source: Elsevier journal article supplement (https://www.sciencedirect.com/science/article/pii/S1870345317301793)
Supplement: mmc2 [file mmc2.docx]

**Apéndice 2**. **Literatura en inglés sobre sistemas socioecológicos, resiliencia y vulnerabilidad por autores mexicanos.**

| Palabras de búsqueda | Literatura |
| --- | --- |
| Services Environment* ecosistem* natural* climate* volcano meteorology | (Anguiano-Cuevas et al., 2015; Aragón-Durand, 2007; Arroyo-Rodríguez et al., 2015; Avila Foucat, 2002; Burney et al., 2015; Camacho-Valdez et al., 2013; Campos et al., 2012; Campos et al., 2014; Cifuentes et al., 2006; Contreras-Loera et al., 2014; Corbera, 2012; Dallimer et al., 2015; Davidson, 2004; De Koning et al., 2011; del Mar Delgado-Serrano et al., 2015; Delgado-Buenrostro et al., 2008; Downs, 2001; Durand-Smith et al., 2011; Giraldo-RodríguezRodríguez et al., 2013; Hartkamp et al., 2004; Heimo et al., 2004; Hernández-Barrios et al., 2015; Hernández Bonilla, 2009; Hodzic et al., 2012; Jujnovsky et al., 2012; Lapeyrouse et al., 2012; Lebreton, 2015; López-García et al., 2014; Luque et al., 2012a; Maneja Zaragoza et al., 2009; Marquette, 2006; Martínez et al., 2010; Mazari-Hiriart et al., 2014; Merlín Uribe et al., 2013; Moctezuma-Malagón et al., 2008; Norman et al., 2012b; Norman et al., 2012c; Pérez Soba et al., 2013; Pérez Verdín et al., 2008; Pezzoli et al., 2014; Resch et al., 2009; Ribeiro-Palacios et al., 2013; Riensche et al., 2015; Rivera-Arriaga, 1998; Ruiz-Mallén et al., 2015; Salas Reyes et al., 2015; Sánchez Azofeifa et al., 2009; Saynes-Vásquez et al., 2013; Soto et al., 2015; Speelman et al., 2014; Toledo-Aceves et al., 2011; Toral Juárez et al., 2016; Torres-Salcido et al., 2015; Türe, 2013; Vargas del Río et al., 2013; Villavicencio, 2011; Yoskowitz et al., 2016; Zalik, 2009) |
| Vulnerability Environment* ecosistem* natural* climate* volcano meteorology | (Adger et al., 2009; Aragón Durand, 2007; Bee, 2014; Brody et al., 2012; Campos et al., 2014; Delgado Lemus et al., 2014; Eakin et al., 2008; Endfield, 2007; Esperón Rodríguez et al., 2016; Farreras et al., 1991; Frank et al., 2011; García, 2010; Ibarrarán et al., 2010; Idrovo, 2011; Jacob et al., 2013; Lara Valencia et al., 2012; Martínez-Arroyo et al., 2011; Martínez-Peña et al., 2013; Matus Kramer, 2011a; Morzaria Luna et al., 2014; Nawrotzki et al., 2013; Norman et al., 2012c; Oppenheimer, 2013; Oswald-Spring, 2001; Romero-Lankao, 2010; Saldaña Zorrilla et al., 2009; Sánchez-Cohen et al., 2013; Siegel, 2014) |
| Adaptation Environment* ecosistem* natural* climate* volcano meteorology | (Bellon et al., 2011; Ellis et al., 2015; Endfield, 2012; Frank et al., 2011; Groenewald et al., 2013; Hernández Cruz et al., 2005; Huber-Sannwald et al., 2012; Ibarrarán et al., 2010; López-Santos et al., 2015; Lugo-Morin et al., 2014; Martínez-Arroyo et al., 2011; Matus-Kramer, 2011a; Meli et al., 2015; Morzaria Luna et al., 2014; Narchi et al., 2015; Pedrozo-Acuña et al., 2015; RodríguezRodríguez-Solorzano, 2011; Romero-Lankao, 2010; Sohn López-Forment, 2000; Thompson et al., 2014; Vis, 2013; Wilson et al., 2012) |
| Risk Environment* ecosistem* natural* climate* volcano meteorology | (Aragón-Durand, 2007; Arellanes et al., 2013; Blancas et al., 2013; Bradshaw, 2004; Bradshaw et al., 2004; Caldeira et al., 2011; Calderón-Garcidueñas et al., 2013; Cifuentes et al., 2002; Collins, 2010; Cutter, 1995; Chagoya-Fuentes, 2009; Delgado-Lemus et al., 2014; Delgado Ramos, 2013; Eastmond et al., 2006; Eaton González et al., 2015; Escudero-Castillo et al., 2012; Esperón-Rodríguez et al., 2016; Estrada et al., 2012; Flores-Ballesteros, 2008; Grineski et al., 2015a; Grineski et al., 2010; Grineski et al., 2015b; Hufnagl-Eichiner et al., 2011; Lankao, 2010; Manuel Navarrete et al., 2015; Nawrotzki et al., 2013; Nichols, 1987; Norman et al., 2012a; Norman et al., 2012c; Ortega-Argueta et al., 2013; Peredo-Alvarez, 2011; Sánchez-Cohen et al., 2013; Stevens et al., 2008; Thompson et al., 2014; Toledo, 2013; Yáñez-Arancibia et al., 2013; Yañez Arenas et al., 2014) |
| Disaster Environment* ecosistem* natural* climate* volcano meteorology | (Aragón Durand, 2007; Bradshaw, 2004; Collins, 2009; Olsen et al., 2013; Pezzoli et al., 2014; Rodríguez Oreggia et al., 2013; Saldaña-Zorrilla et al., 2009; Sánchez-Cohen et al., 2013) |
| floods Environment* ecosistem* natural* climate* volcano meteorology | (Aragón-Durand, 2007; Brody et al., 2012; Collins, 2009; Endfield, 2007; Endfield et al., 2004; Flocks et al., 2009; Mendoza Cantú et al., 2011; Norman et al., 2012c; RodríguezRodríguez-Oreggia et al., 2013; Romero Lankao, 2010) |
| danger* Environment* ecosistem* natural* climate* volcano meteorology | (Hendrickson et al., 2002; Meraz et al., 2015; Ojeda-Benítez et al., 2013; Peredo-Alvarez, 2011) |
| resistance Environment* ecosistem* natural* climate* volcano meteorology | (Brunt, 1992; Fletes-Ocón et al., 2013; Martínez, 2015; Massieu-Trigo et al., 2015; Morales Jr et al., 2012; Tetreault, 2015; Toledo et al., 2015; Valdez et al., 2006) |
| resilien* Environment* ecosistem* natural* climate* volcano meteorology | (Brody et al., 2012; Castán-Broto et al., 2013; Craig, 2011; Ellis et al., 2015; Endfield, 2012; Fernald et al., 2015; García, 2010; Gómez-Pompa et al., 1999; Ibarrarán et al., 2010; Lawrence et al., 2010; Li, 2011; Moctezuma-Malagón et al., 2008; Moreno Calles et al., 2012; Rogé et al., 2015; Roybal, 2012; Sánchez-Cohen et al., 2013; Savolainen et al., 2015; Strauss, 2007; Thompson et al., 2014; Yáñez-Arancibia et al., 2013) |
| adapta* Environment* ecosistem* natural* climate* volcano meteorology | (Adger et al., 2009; Baca et al., 2014; Baronchelli et al., 2013; Bee, 2014; Bellon et al., 2011; Blanton, 1972; Boero et al., 2015; Buzinde et al., 2010; Campos et al., 2014; Christensen, 1998; de Sherbinin et al., 2011; Des Lauriers, 2009; Douglas et al., 2015; Eakin, 2002; Ellis et al., 2015; Endfield, 2007; 2012; Frank et al., 2011; García Martínez et al., 2015; Gerez Fernández et al., 2011; González-Martínez et al., 2015; Gónzalez et al., 2013; Groenewald et al., 2013; Hernández Cruz et al., 2005; Hobday et al., 2013; Huber Sannwald et al., 2012; Ibarrarán et al., 2010; Jackson et al., 2012; Keleman et al., 2013; Li, 2011; Little et al., 1986; López Santos et al., 2015; Lugo Morin et al., 2014; Magaña et al., 2000; Manuel Navarrete et al., 2015; Martínez-Arroyo et al., 2011; Matus-Kramer, 2011a; Morzaria Luna et al., 2014; Narchi et al., 2015; Nawrotzki et al., 2015; Oppenheimer, 2013; Orlove, 2005; Patrick-Encina et al., 2010; Pedrozo Acuña et al., 2015; Quiroga et al., 2015; Rodríguez Solorzano, 2011; Romero Lankao, 2010; Romero Lankao et al., 2014; Rossing et al., 2010; Ruiz Mallén et al., 2015; Sánchez-Cohen et al., 2013; Sohn López-Forment, 2000; Thompson et al., 2014; Torres-Lima et al., 2011; Vásquez León et al., 2003; Vis, 2013) |
| Sustainability Environment* ecosistem* natural* climate* volcano meteorology | (Aguilar, 2008; Aguilar et al., 2007; Aguirre-Muñoz et al., 2001; Alayón Gamboa et al., 2008; Astier et al., 2012; Avila Foucat, 2002; Badano, 2011b; Bamufleh et al., 2013; Bismarck et al., 2006; Blancas et al., 2013; Boelling et al., 2003; Bowen et al., 2008; Bowen et al., 2009; Burns, 2013; Campos et al., 2014; Cifuentes et al., 2006; Cinti et al., 2014; Corbera, 2012; Corral Verdugo et al., 2014; del Mar Delgado-Serrano et al., 2015; Encalada, 2011; Fernald et al., 2012; Frank et al., 2011; Gil et al., 2015; González-Esquivel et al., 2015; Gustafsson et al., 2015; Haberl et al., 2006; Hargrove et al., 2013; Hill et al., 2015; Howard, 2008; Huesca Pérez et al., 2016; Hufnagl Eichiner et al., 2011; Ibarrarán et al., 2010; Jiménez-Domínguez et al., 2002; Kerr et al., 2014; Keys, 2010; López García et al., 2014; López-Ridaura et al., 2002; Mancebo, 2007; Manson, 2006; Manuel-Navarrete et al., 2006; Manuel Navarrete et al., 2015; Martínez Arroyo et al., 2011; Martínez-García, 2005; Martínez-Reyes, 2004; Masera et al., 2005; McAfee, 2004; McEvoy, 2015; McEvoy, 2013; Medina-Ross et al., 2005; Meehan, 2010; Mena-Mesa et al., 2014; Merlín-Uribe et al., 2013; Moctezuma-Malagón et al., 2008; Moriel-Robles, 2009; Nichols et al., 2007; Norman et al., 2012b; Norman et al., 2012c; Olson, 2012; Oswald-Spring, 2011; Padilla-Rivera et al., 2016; Palomino et al., 2010; Putney, 2006; Rasutis et al., 2015; Riensche et al., 2015; Rockström et al., 2014; Russell, 2013; Salas-Reyes et al., 2015; Santibañez-Aguilar et al., 2014; Santoyo-Castelazo et al., 2014; Schembri et al., 2014; Selfa et al., 2015; Siegel, 2014; Sietz et al., 2011; Strauss, 2007; Tejeda, 2002; Tella et al., 2014; Torres-Lima et al., 2008; Türe, 2013; Turner et al., 2012; Uribe et al., 2014; Uribe, 2009; Vargas-Hernández, 2010; Velez et al., 2014; Yáñez Arancibia et al., 2013; Yoskowitz et al., 2016) |
