# Supplementary material
Source: Elsevier journal article supplement (https://www.sciencedirect.com/science/article/pii/S1870345317301793)
Supplement: mmc3 [file mmc3.docx]

**Apéndice 3. Literatura en español sobre sistemas socioecológicos, resiliencia y vulnerabilidad por autores mexicanos. NO LO ENCONTRÉ CITADO EN EL TEXTO…, VERIFICAR**

| Palabras de búsqueda | Literatura |
| --- | --- |
| Servicios ambientales o Servicios ecosistémicos | (Badano, 2011a; Borrego et al., 2014; Carabias, 2011; Durand-Smith, 2014; Espinoza-Tenorio et al., 2014; Hernández-Trejo et al., 2009; Maass et al., 2010; Mallén et al., 2011; Pastrana, 2010; Perevochtchikova et al., 2014; Pérez-Campuzano, 2011; Piketty et al., 2014; Ruelas-Monjardín et al., 2014; Sánchez Velásquez et al., 2008) |
| Socioecosistema o Socioecológico o Social Ambiental | (Aguilar-Rivera et al., 2015; Alfie C, 2013; Basurto et al., 2013; Bocco et al., 2013; Bonilla-Elvira, 2015; Brenner, 2010; Catalán-Vázquez et al., 2015; Cavazos-Arroyo et al., 2014; de la Lanza-Espino et al., 2015; del Ángel-Pérez et al., 2009; Denegri-de Dios et al., 2011; Flores, 2013; Fortmann et al., 2010a; 2010b; Granados-Campos, 2010; Guevara-Sanginés et al., 2015; Huesca-Pérez et al., 2016; Jáuregui-Nolen et al., 2012; Merçon et al., 2012; Molano Niño et al., 2014; Morales-Espinosa, 2009; Moreno et al., 2015; Ochoa-Meza et al., 2014; Patrick-Encina et al., 2010; Perevochtchikova et al., 2014; Riojas-Rodríguez et al., 2013; Sánchez Lezama et al., 2014; Sánchez-Morales et al., 2014; Sims et al., 2014; Vargas-del Río et al., 2013; Zavala, 2013) |
| Vulnerabilidad Ambient* ecosistema* natural* clima* volcán, metereológico hidrometereológico Socio* México | (Acosta-López et al., 2011; Aguilar-Román et al., 2012; Aguirre et al., 2006; Álvarez, 2012; Álvarez-Gordillo et al., 2015; Angelotti-Pasteur, 2014; Barrios-Yllan, 2007; Beraud Lozano et al., 2009; Bertoux et al., 2015; Bojórquez et al., 2015; Bravo-Peña et al., 2010; Cabrera-Pérez et al., 2013; Castañeda-Camacho, 2013; Castillo-Oropeza, 2014; Cohen, 2007; Corona, 2015; Cruz-Morales et al., 2010; Cuevas-Muñiz et al., 2005; de Alba et al., 2014; de la Vega-Navarro, 2014; del Ángel-Pérez et al., 2014; del Ángel Pérez et al., 2011; del Ángel-Pérez et al., 2013; Delgadillo, 2001; Enríquez-Acosta et al., 2013; Escobar Rosas, 2001; GarcíaGarcía-Azpeitia, 2006; González César, 1999; González-Chávez et al., 2007; González-Martínez et al., 2015; Gónzalez et al., 2013; Granados-Martínez, 2015; Hernández et al., 2010; Hernández-Zúñiga, 2010; Ibarrarán et al., 2014; Isunza-Vizuet, 2010; Juárez-Gutiérrez et al., 2006; Lara-Valencia et al., 2012; Luque et al., 2012b; Macías, 2009; Macías, 1992; Manzo-Guerrero, 2012; Martínez-Arroyo et al., 2011; Martínez-Laguna, 1998; Martínez-Rodríguez et al., 2014a; Martínez-Rodríguez et al., 2014b; Marúm-Espinosa et al., 2014; Meza-Cuellar, 2013; Moctezuma-López et al., 2014; Monroy-Ortiz, 2013; Mora-Salas et al., 2006; Morales-Cárdenas et al., 2013; Morales-Espinosa, 2009; Nahed-Toral et al., 2014; Olguín-Ortiz, 2010; Oliva-Aguilar et al., 2011; Orozco Hernández et al., 2014; Peña-Villada, 2006; Reyna, 2006; Rodríguez-Herrera et al., 2012; Rodríguez-Velázquez, 1998; 2001; Rojas-Sigala et al., 2015; Rubio-Carriquiriborde, 2012; Rubio-Carriquiriborde, 2012a; Rubio-Maldonado et al., 2010; Ruiz Meza, 2012; 2014; Salinas-Zuñiga, 2006; Sánchez-González, 2012; Sánchez-González et al., 2011; Segundo-De Jesus, 2015; Segundo-Métay et al., 2015; Serrano-Sánchez, 2009; Soares et al., 2013c; 2013a; Soares et al., 2014; Soares-Morales et al., 2011; Thomas-Bohórquez, 2013; Torres Lima et al., 2011; Torres Lima et al., 2008; Vallejo-Nieto et al., 2011; Velázquez García, 2007; Vergara-González, 2011; Vergara-Tenorio et al., 2011; Wilder et al., 2010) |
| Adaptación Ambient* ecosistema* natural* clima* volcán, meteorológico hidrometeorológico Socio* México | (Carrillo-González et al., 2011; Delgado et al., 2013; Escalón-Portilla, 2012; García-Gomez et al., 2011; Gutiérrez et al., 2015; Legorreta-Ramírez et al., 2015; Martínez et al., 2015; Mawdsley et al., 2009; Nahed Toral et al., 2014; Orozco-Ramírez et al., 2014; Pfeifer, 1966; Sánchez-Corral, 2015; Serra-Puche et al., 2009; Sierra-Vázquez et al., 2002; Velázquez, 2012; Yerena-Yamallel et al., 2015) |
| Riesgos Ambient* ecosistema* natural* clima* volcán, metereológico hidrometereológico Socio* México | (Aguilar-Rivera et al., 2015; Bertoux et al., 2015; Bojorquez et al., 2013; Bosque, 2013; Castillo et al., 2009; Catalán-Vázquez et al., 2015; de la Rosa-Leal, 2007; Díaz-Gutiérrez et al., 2012; Durand-Smith et al., 2009; Eastmond et al., 2006; Espinoza-Tenorio et al., 2012; Esteves, 2007; Flores Xolocotzi et al., 2010; Gamboa, 2010; González-Merino et al., 2009; Hernández-García, 2014; Kolb, 2013; Mallén et al., 2011; Montiel-Montoya, 2010; Nahed-Toral et al., 2014; Nieto et al., 2008; Ochoa-Nogales et al., 2012; Ortega-Argueta et al., 2013; Oswald-Spring, 2001; Ponce-Vélez et al., 2012; Ramírez-Meza et al., 2010; Richard, 2008; Rona-Szekely, 2013; Sánchez-Saldaña et al., 2006; Soares et al., 2013b; Vergara Tenorio et al., 2011; Vergara-Tenorio et al., 2009; Yáñez-Arancibia et al., 2014) |
| Desastre Ambient* ecosistema* natural* clima* volcán, metereológico hidrometereológico Socio* México | (Álvarez-Gordillo et al., 2008; Barkin, 2007; Baró-Suárez et al., 2007; Basail-Rodríguez, 2012; Bitrán, 2009; Castillo Oropeza, 2014; de Alba et al., 2014; Galindo-Serrano et al.; Garza-Merodio, 2007; Granier-Melo et al., 2008; Hernández et al., 2010; Ibarrarán et al., 2014; Juárez Becerril; Juárez Gutiérrez et al., 2006; Lara Colín Cruz, 2013; Ley García et al., 2008; Macías, 1992; Oliva-Aguilar et al., 2011; Pasteur, 2014; Pliego Carrasco, 1992; Rodríguez-Castillo et al., 2006; Sandoval-Ayala et al., 2015; Soares et al., 2013b; Solano et al., 2011; Toscana-Aparicio et al., 2014; Vallejo Nieto et al., 2011) |
| Inundaciones Ambient* ecosistema* natural* clima* volcán, metereológico hidrometereológico Socio* México | (Baró Suárez et al., 2007; Castillo Oropeza, 2014; Chávez-Ballado, 2007; de Alba et al., 2014; Espejel Carbajal et al.; Gómez Fuentes, 2009; Hernández et al., 2010; Longar et al., 2006; Rubio Carriquiriborde, 2012b; Vallejo Nieto et al., 2011; Vergara Tenorio et al., 2011) |
| Peligro Ambient* ecosistema* natural* clima* volcán, metereológico hidrometereológico Socio* México | (Córdova Bojórquez et al., 2012; García et al., 1995; Haenn et al., 2014; Kolb, 2013; Ley-García et al., 2008; Ley García et al., 2013; Muñoz Robles et al., 2005; Ortega-Argueta et al., 2013; Rodríguez-Bolaños et al., 2014; Saldaña-Zorrilla, 2007; Salinas-Chávez et al., 2015; Sánchez, 1990) |
| Resistencia Ambient* ecosistema* natural* clima* volcán, metereológico hidrometereológico Socio* México | (Ávila-García et al., 2013; Díaz, 2006; García-Lara et al., 2007; Guillén-Vicente, 2013; Luque et al., 2012b; Martínez-Omaña et al., 2011; Massieu-Trigo et al., 2015; Mendoza et al., 2013; Moreno-Arriba, 2015; Navarro-Smith et al., 2014; Pérez-Negrete, 2013; Rea Rodríguez et al., 2015; Riva Palacio de Icaza, 2014; Robles Rendón et al., 2011; Rodríguez-Wallenius, 2013; Sabás-Vargas, 2012; Sánchez, 1996; Tetreault, 2013; 2015; The Economist, 2004; Tischler et al., 2011; Toledo et al., 2015; Villa-Jaime, 2014) |
| Resiliencia Ambient* ecosistema* natural* clima* volcán, metereológico hidrometereológico Socio* México | (Meave del Castillo et al., 2012) |
| Adapt* Ambient* ecosistema* natural* clima* volcán, metereológico hidrometereológico Socio* México | (Basset, 2012; Bee, 2014; Bellon et al., 2011; Cruz Petit, 2014; de Sherbinin et al., 2011; Desales Lara et al., 2013; Downs, 2001; Endfield, 2012; Frank et al., 2011; Gerez Fernández et al., 2011; Girón de la Peña, 2015; González Martínez et al., 2015; Gónzalez et al., 2013; Groenewald et al., 2013; Guevara-Moreno Casasola, 2015; Gurri, 2010; Huber-Sannwald et al., 2012; Ibarrarán et al., 2010; Ibarrarán et al., 2014; Jackson et al., 2012; Leyequién-Abarca, 2006; Li, 2011; López-Santos et al., 2015; Lugo-Morin et al., 2014; Magaña et al., 2000; Martínez-Arroyo et al., 2011; Martínez-Monroy, 2013; Matus-Kramer, 2011b; Melero-Hernández et al., 2013; Meli et al., 2015; Mendoza-García, 2013; Morzaria-Luna et al., 2014; Nawrotzki et al., 2015; Ortega Argueta et al., 2013; Palacios-Delgado et al., 2013; Pastor-Alfonso, 2012; Patrick-Encina et al., 2010; Pedrozo-Acuña et al., 2015; Portocarrero et al., 2014; Ríos Cortez et al., 2012; Rodríguez Solorzano, 2011; Romero-Lankao et al., 2014; Ruiz-Mallén et al., 2015; Saldaña-Zorrilla, 2007; Sánchez-Cohen et al., 2013; Soares et al., 2011; Soares-Morales et al., 2011; Torres Lima et al., 2011) |
